# Supplementary material
Source: PubMed Central journal article supplement (PMC4026437)
Supplement: 12263_2014_401_MOESM1_ESM.pdf [file 12263_2014_401_MOESM1_ESM.pdf]

## Genetic signature of differential sensitivity to stevioside in the Italian population

### *Genes and Nutrition*

Davide Risso, Gabriella Morini, Luca Pagani, Andrea Quagliariello, Cristina Giuliani, Sara De Fanti, Marco Sazzini, Donata Luiselli and Sergio Tofanelli

D.Risso

Lab. of Molecular Anthropology & Centre for Genome Biology, Dept. BiGeA, University of Bologna, via Zamboni 33, 40126 Bologna, Italy  
email: davide.risso2@unibo.it

### Online Resource 1 Hardy-Weinberg equilibrium in the examined SNPs

| CHR | SNP        | P value |
|-----|------------|---------|
| 7   | rs2234001  | 0.6743  |
| 7   | rs10246939 | 1       |
| 7   | rs1726866  | 0.8354  |
| 7   | rs713598   | 1       |
| 12  | rs11610105 | 0.08584 |
| 12  | rs3741843  | 0.6842  |
| 12  | rs7138535  | 0.0652  |
