# Supplementary material
Source: PubMed Central journal article supplement (PMC4026437)

## Genetic signature of differential sensitivity to stevioside in the Italian population

### *Genes and Nutrition*

Davide Risso, Gabriella Morini, Luca Pagani, Andrea Quagliariello, Cristina Giuliani, Sara De Fanti, Marco Sazzini, Donata Luiselli and Sergio Tofanelli

D.Risso

Lab. of Molecular Anthropology & Centre for Genome Biology, Dept. BiGeA, University of Bologna, via Zamboni 33, 40126 Bologna, Italy  
email: [davide.risso2@unibo.it](mailto:davide.risso2@unibo.it)

**Online Resource 2** Distribution of PROP sensitivity in the Italian sample. The x-axis indicates the Labeled Magnitude Scale (LMS) scores while the y-axis the number of individuals

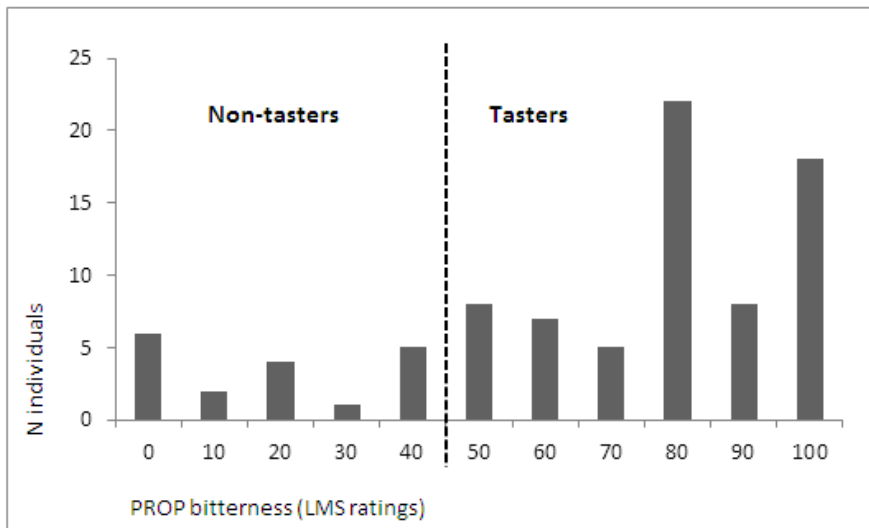

Supplement: 12263_2014_401_MOESM2_ESM.pdf [file 12263_2014_401_MOESM2_ESM.pdf]
