# Supplementary material
Source: PubMed Central journal article supplement (PMC4026437)
Supplement: 12263_2014_401_MOESM3_ESM.pdf [file 12263_2014_401_MOESM3_ESM.pdf]

## Genetic signature of differential sensitivity to stevioside in the Italian population

### *Genes and Nutrition*

Davide Risso, Gabriella Morini, Luca Pagani, Andrea Quagliariello, Cristina Giuliani, Sara De Fanti, Marco Sazzini, Donata Luiselli and Sergio Tofanelli

D.Risso

Lab. of Molecular Anthropology & Centre for Genome Biology, Dept. BiGeA, University of Bologna, via Zamboni 33, 40126 Bologna, Italy

email: [davide.risso2@unibo.it](mailto:davide.risso2@unibo.it)

**Online Resource 3** Hardy Weinberg equilibrium in TAS2R14 *rs3741843* and TAS2R4 *rs2234001* polymorphisms among 1000 genomes populations

| <i>rs3741843</i> |        | <i>rs2234001</i> |        |
|------------------|--------|------------------|--------|
| POP              | P-val  | POP              | P-val  |
| YRI              | 0.3977 | YRI              | 0.6071 |
| LWK              | 0.3081 | LWK              | 0.657  |
| ASW              | 0.4279 | ASW              | 0.7865 |
| CLM              | 1.000  | CLM              | 1.000  |
| MXL              | 0.5377 | MXL              | 1.000  |
| PUR              | 0.7364 | PUR              | 0.4166 |
| CHB              | 1.000  | CHB              | 0.1114 |
| JPT              | 1.000  | JPT              | 1.000  |
| CHS              | 0.4783 | CHS              | 0.8065 |
| CEU              | 0.3479 | CEU              | 0.5185 |
| FIN              | 1.000  | FIN              | 1.000  |
| GBR              | 0.3642 | GBR              | 1.000  |
| IBS              | 1.000  | IBS              | 0.6209 |
| TSI              | 0.4562 | TSI              | 0.5436 |
