# Supplementary material
Source: PubMed Central journal article supplement (PMC4026437)
Supplement: 12263_2014_401_MOESM4_ESM.pdf [file 12263_2014_401_MOESM4_ESM.pdf]

## Genetic signature of differential sensitivity to stevioside in the Italian population

### Genes and Nutrition

Davide Risso, Gabriella Morini, Luca Pagani, Andrea Quagliariello, Cristina Giuliani, Sara De Fanti, Marco Sazzini, Donata Luiselli and Sergio Tofanelli

D.Risso

Lab. of Molecular Anthropology & Centre for Genome Biology, Dept. BiGeA, University of Bologna, via Zamboni 33, 40126 Bologna, Italy  
email: davide.risso2@unibo.it

**Online Resource 4** Observed Heterozygosity (OH) and P-values generated for heterozygosity test of TAS2R14 *rs3741843* and TAS2R4 *rs2234001* polymorphisms across 1000 genomes populations (N= number of individuals). YRI, Yoruba from Ibadan (Nigeria); LWK, Luhya from Webuye (Kenya); ASW, people with African ancestry from Southwest United States; IBS, Iberian populations from Spain; TSI, Tuscans from Italy; CEU, Utah residents with Northern and Western European ancestry; GBR, British from England and Scotland; FIN, Finnish; PUR, Puerto Ricans; CLM, Colombians from Medellin; MXL, people with Mexican ancestry from Los Angeles; JPT, Japanese from Tokyo; CHB, Han Chinese from Beijing; CHS, Han Chinese from Southern China

| <i>rs3741843</i> |     |         |        | <i>rs2234001</i> |     |         |        |
|------------------|-----|---------|--------|------------------|-----|---------|--------|
| POP              | N   | OH      | P-val  | POP              | N   | OH      | P-val  |
| <u>Africa</u>    |     |         |        | <u>Africa</u>    |     |         |        |
| YRI              | 88  | 0.55682 | 0.2066 | YRI              | 88  | 0.38636 | 0.7871 |
| LWK              | 97  | 0.44330 | 0.9160 | LWK              | 97  | 0.43299 | 0.7770 |
| ASW              | 61  | 0.52459 | 0.2783 | ASW              | 61  | 0.50820 | 0.4088 |
| <u>America</u>   |     |         |        | <u>America</u>   |     |         |        |
| CLM              | 60  | 0.21667 | 0.4866 | CLM              | 60  | 0.51667 | 0.5046 |
| MXL              | 66  | 0.18182 | 0.8594 | MXL              | 66  | 0.50000 | 0.4975 |
| PUR              | 55  | 0.41818 | 0.4415 | PUR              | 55  | 0.43636 | 0.8918 |
| <u>Asia</u>      |     |         |        | <u>Asia</u>      |     |         |        |
| CHB              | 97  | 0.14433 | 0.6018 | CHB              | 97  | 0.44330 | 0.0760 |
| JPT              | 89  | 0.07865 | 0.8838 | JPT              | 89  | 0.35955 | 0.5356 |
| CHS              | 100 | 0.14000 | 0.8882 | CHS              | 100 | 0.42000 | 0.4593 |
| <u>Europe</u>    |     |         |        | <u>Europe</u>    |     |         |        |
| CEU              | 85  | 0.24706 | 0.2466 | CEU              | 85  | 0.54118 | 0.3082 |
| FIN              | 93  | 0.12903 | 0.6816 | FIN              | 93  | 0.49462 | 0.6319 |
| GBR              | 89  | 0.21348 | 0.9404 | GBR              | 89  | 0.49438 | 0.5692 |
| IBS              | 14  | 0.35714 | 0.6555 | IBS              | 14  | 0.42857 | 0.8799 |
| TSI              | 98  | 0.28571 | 0.3050 | TSI              | 98  | 0.54082 | 0.2856 |
