# Supplementary material
Source: PubMed Central journal article supplement (PMC4026437)
Supplement: 12263_2014_401_MOESM5_ESM.pdf [file 12263_2014_401_MOESM5_ESM.pdf]

## Genetic signature of differential sensitivity to stevioside in the Italian population

### *Genes and Nutrition*

Davide Risso, Gabriella Morini, Luca Pagani, Andrea Quagliariello, Cristina Giuliani, Sara De Fanti, Marco Sazzini, Donata Luiselli and Sergio Tofanelli

D.Risso

Lab. of Molecular Anthropology & Centre for Genome Biology, Dept. BiGeA, University of Bologna, via Zamboni 33, 40126 Bologna, Italy

email: davide.risso2@unibo.it

### Online Resource 5 Pairwise FST percentile of TAS2R4 *rs2234001* and TAS2R14 *rs3741843* polymorphisms

| <b>Rs</b>  | <b>rs2234001</b> | <b>rs3741843</b> |
|------------|------------------|------------------|
| Chr        | 7                | 12               |
| Pos        | 141478574        | 11091432         |
| AFR_AMR    | 0,9              | 0,95             |
| AFR_ASN    | 0,95             | 0,975            |
| AFR_EUR    | 0,5              | 0,95             |
| AFRssa_AMR | 0,9              | 0,95             |
| AFRssa_ASN | 0,95             | 0,975            |
| AFRssa_EUR | 0,5              | 0,975            |
| AMR_ASN    | 0,9              | 0,8              |
| AMR_EUR    | 0,8              | 0,5              |
| ASN_EUR    | 0,9              | 0,5              |
| ASW_LWK    | 0,2              | 0,8              |
| ASW_YRI    | 0,8              | 0,9              |
| CEU_FIN    | 0,05             | 0,8              |
| CEU_GBR    | 0,5              | 0,2              |
| CEU_IBS    | 0,2              | 0,2              |
| CEU_TSI    | 0,01             | 0,2              |
| CHB_CHS    | 0,2              | 0,1              |
| CHB_JPT    | 0,2              | 0,5              |
| CHS_JPT    | 0,5              | 0,5              |
| CLM_MXL    | 0,2              | 0,01             |
| CLM_PUR    | 0,01             | 0,99             |
| FIN_GBR    | 0,2              | 0,9              |
| FIN_IBS    | 0,1              | 0,8              |
| FIN_TSI    | 0,05             | 0,9              |
| GBR_IBS    | 0,001            | 0,2              |
| GBR_TSI    | 0,5              | 0,1              |
| IBS_TSI    | 0,2              | 0,1              |
| LWK_YRI    | 0,5              | 0,1              |
| MXL_PUR    | 0,2              | 0,95             |
